# Supplementary material for: Exhaled Carbon Monoxide Levels in Forty Resistant to Cessation Male Smokers after Six Months of Full Switch to Electronic Cigarettes (e-Cigs) or to A Tobacco Heating Systems (THS)
Source: MDPI journal article supplement (doi:10.3390/ijerph16203916), 2019-10-15
Supplement: s1 [file s1]

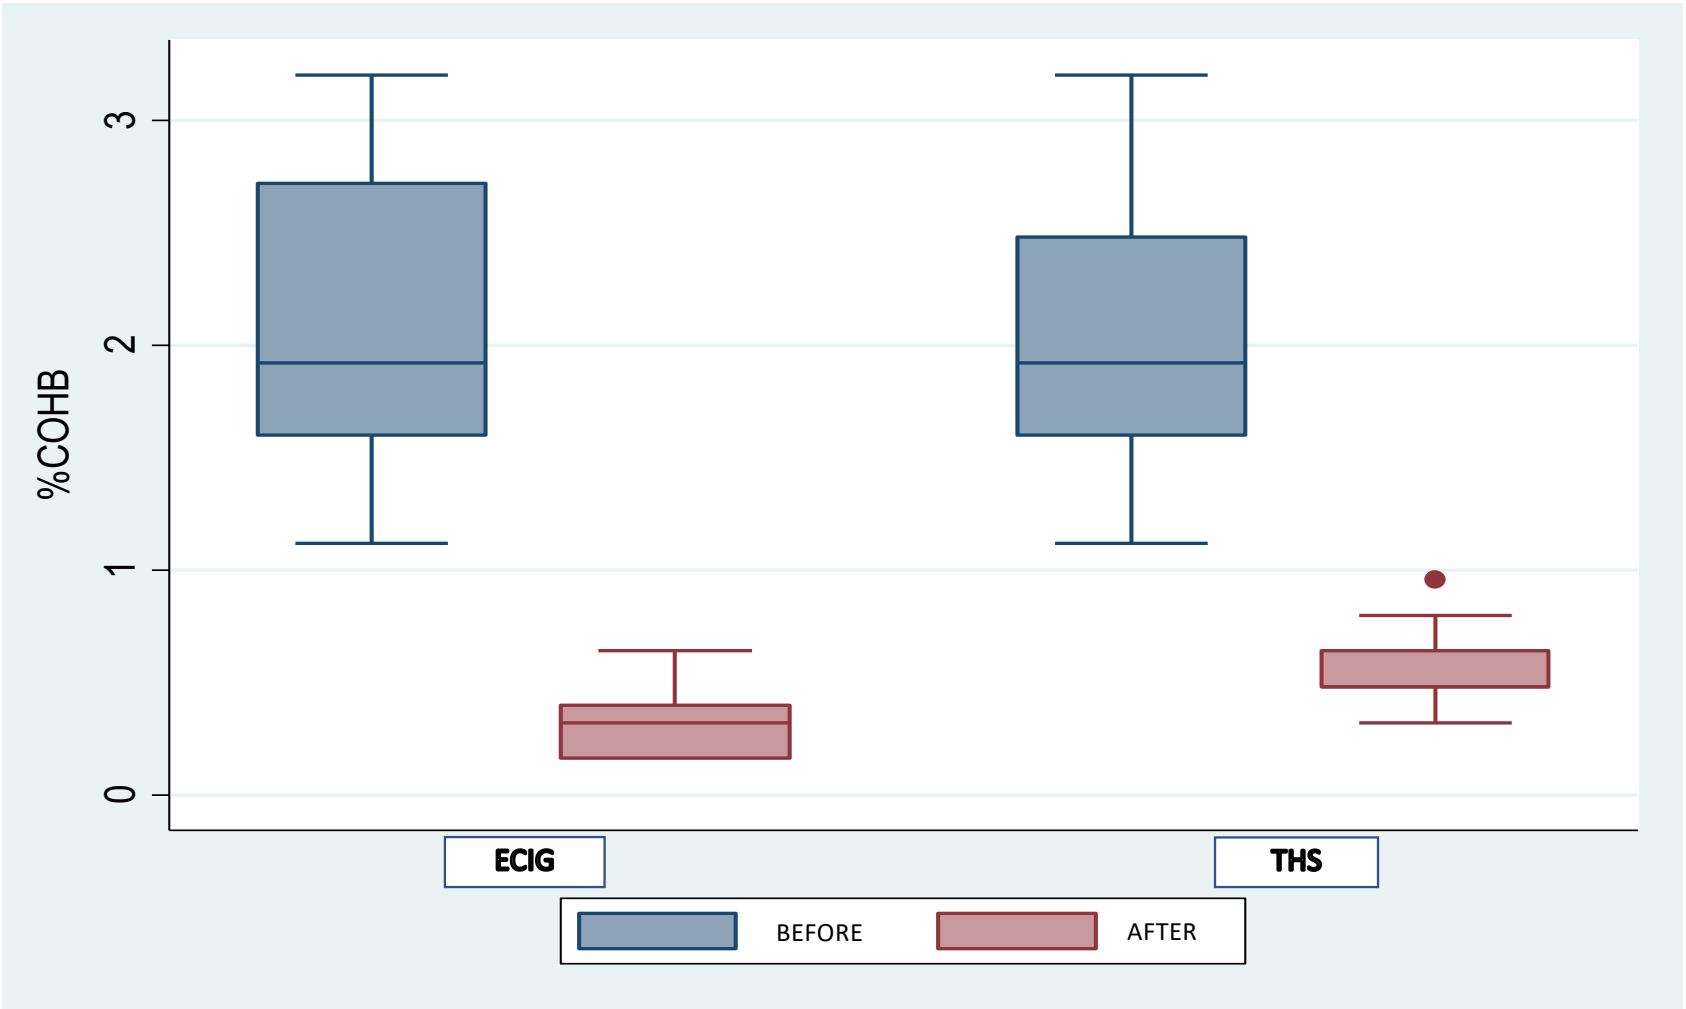

Figure 1: %COHb before and after switch

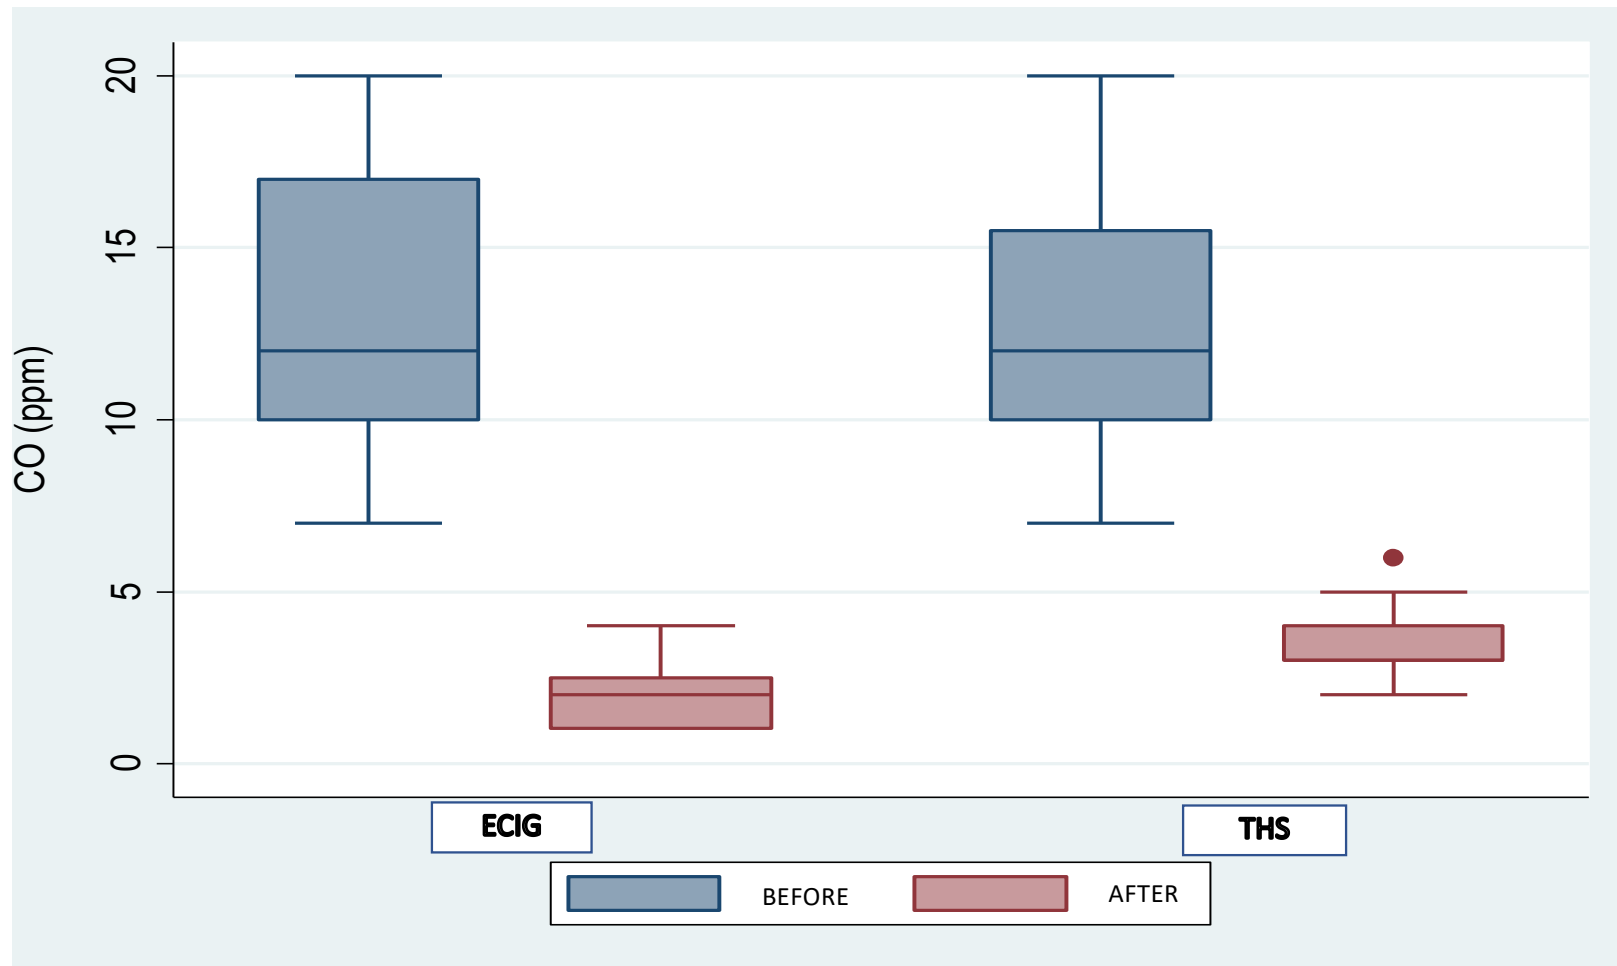

Figure 2: CO ppm before and after switch

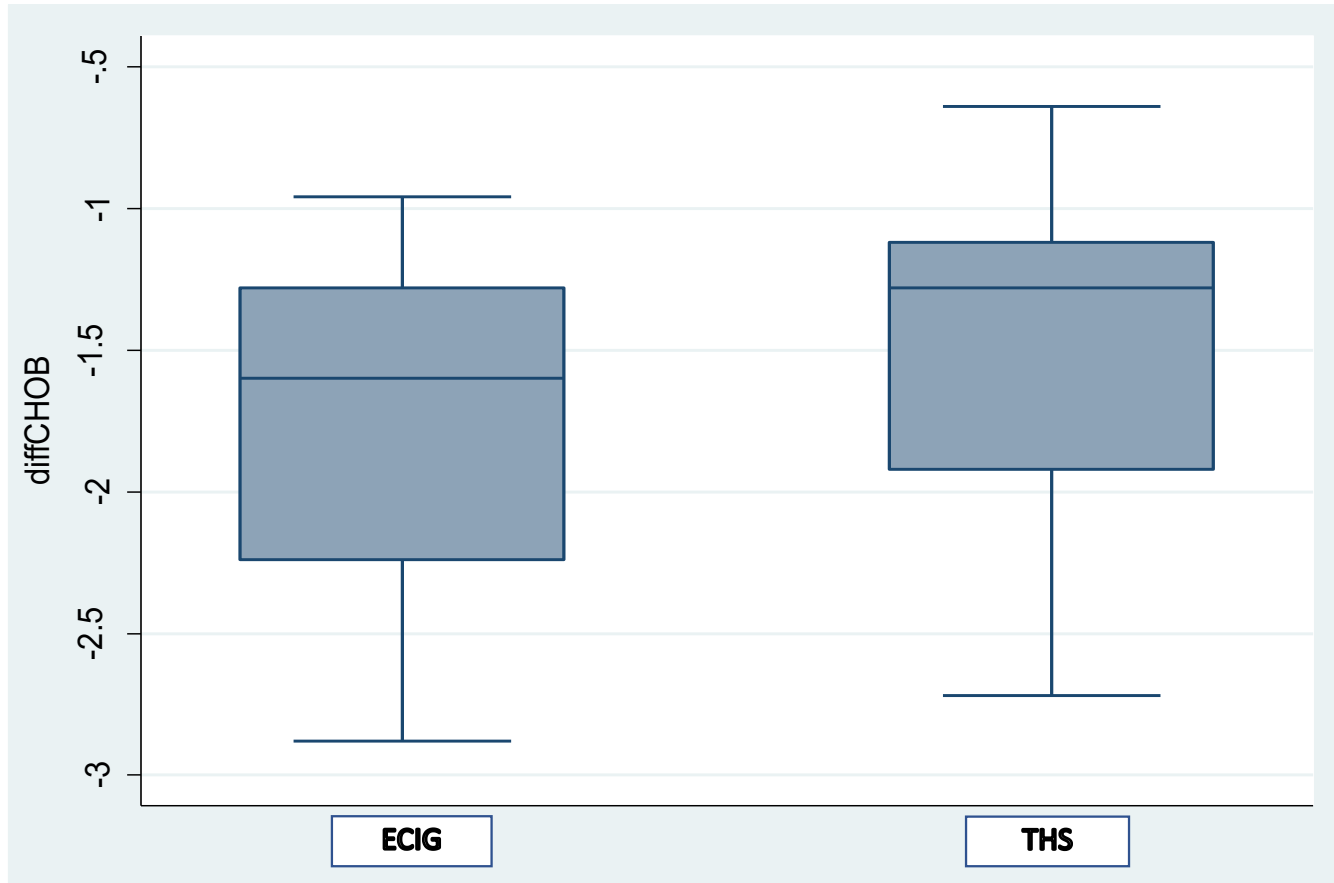

Figure 3: Difference %COHb before and after switch in the 2 groups

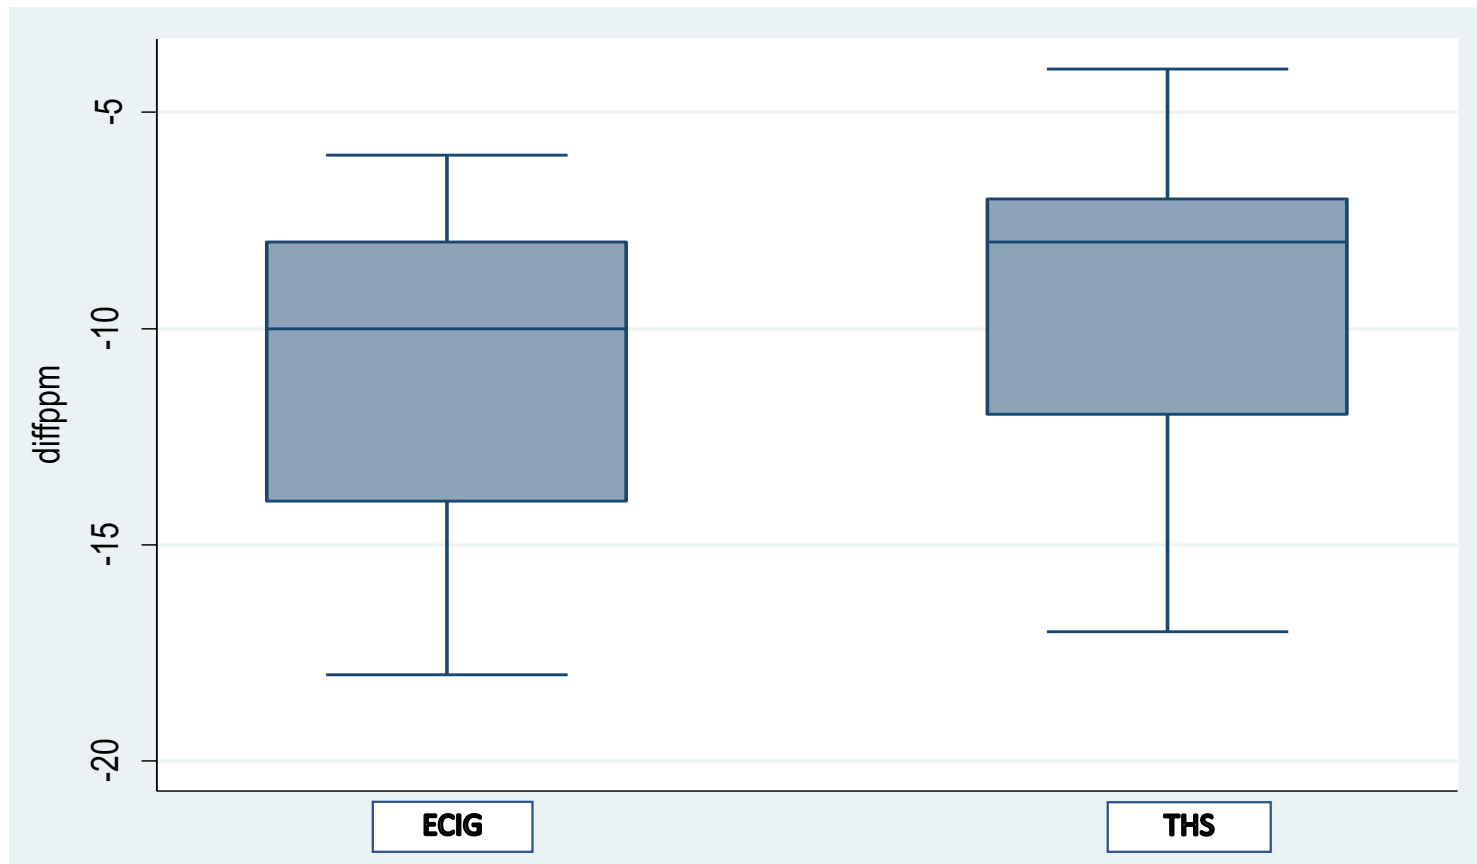

Figure 4: Difference CO ppm before and after switch in the 2 groups
